# Supplementary material
Source: Springer Nature journal article supplement (https://www.springermedizin.de/resource/supplementary/12990_2009_245_MOESM1_ESM.pdf/9612874)

**A**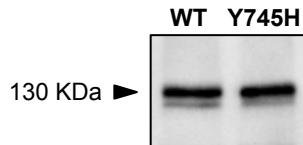**C**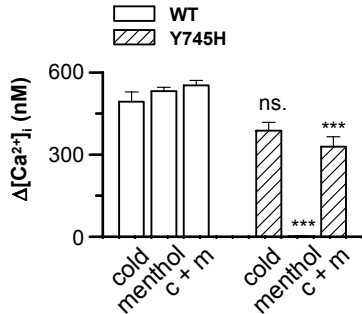**B**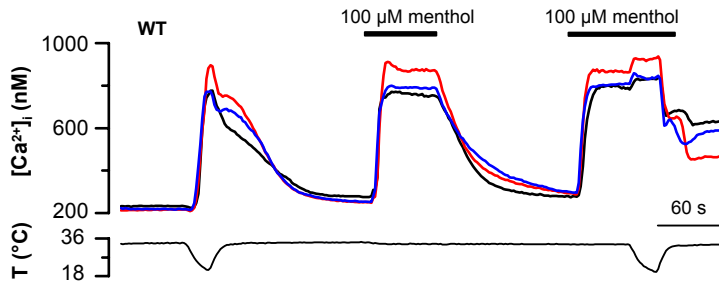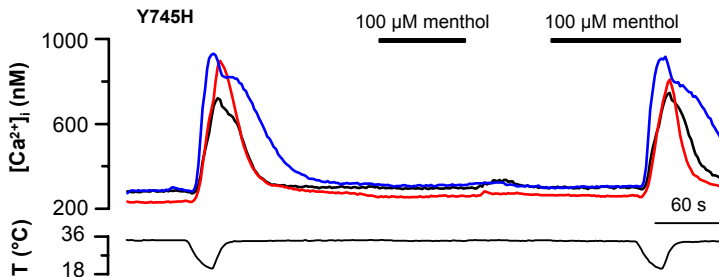

Supplement: MOESM1 [file 9612874]
